# Supplementary material for: Bone-Targeting Nanoparticles of a Dendritic (Aspartic acid)3-Functionalized PEG-PLGA Biopolymer Encapsulating Simvastatin for the Treatment of Osteoporosis in Rat Models
Source: MDPI journal article supplement (doi:10.3390/ijms231810530), 2022-09-11
Supplement: s1 [file s1]

## Supporting Information

# Bone-targeting nanoparticles of a dendritic (aspartic acid)<sub>3</sub>-functionalized PEG-PLGA biopolymer encapsulating simvastatin for the treatment of osteoporosis in rat models

Che-Wei Lin<sup>1,2,3,†</sup>, Chih-Yun Lee<sup>2,3,4,†</sup>, Sung-Yen Lin<sup>2,3,5,6,7</sup>, Lin Kang<sup>8</sup>, Yin-Chih Fu<sup>2,3,5,6,7</sup>, Chung-Hwan Chen<sup>2,3,5,6,7,9</sup>, and Chih-Kuang Wang<sup>1,2,3,4,10,\*</sup>

<sup>1</sup> Department of Medicinal and Applied Chemistry, College of Life Science, Kaohsiung Medical University, Kaohsiung 80708, Taiwan

<sup>2</sup> Regenerative Medicine and Cell Therapy Research Center, Office of Research and Development, Kaohsiung Medical University, Kaohsiung 80708, Taiwan

<sup>3</sup> Orthopaedic Research Center, College of Medicine, Kaohsiung Medical University, Kaohsiung 80708, Taiwan

<sup>4</sup> Ph.D. program in Life Sciences, College of Life Science, Kaohsiung Medical University, Kaohsiung 80708, Taiwan

<sup>5</sup> Departments of Orthopaedics, School of Medicine, College of Medicine, Kaohsiung Medical University, Kaohsiung 80708, Taiwan

<sup>6</sup> Department of Orthopaedics, Kaohsiung Medical University Hospital, Kaohsiung Medical University, Kaohsiung 80708, Taiwan

<sup>7</sup> Department of Orthopaedics, Kaohsiung Municipal Ta-Tung Hospital, Kaohsiung Medical University, Kaohsiung 80145, Taiwan

<sup>8</sup> Department of Obstetrics and Gynecology, National Cheng Kung University Hospital, College of Medicine, National Cheng Kung University, Tainan 70101, Taiwan

<sup>9</sup> Ph.D. Program in Biomedical Engineering, College of Medicine, Kaohsiung Medical University, Kaohsiung 80708, Taiwan

<sup>10</sup> Graduate Institute of Medicine, College of Medicine, Kaohsiung Medical University, Kaohsiung 80708, Taiwan

\* Correspondence: ckwang@kmu.edu.tw; Tel.: +886-7-312-1101 (ext. 2677)

† These authors contributed equally to this work.

The APP verification is briefly described, and the related chemical evidence for each step, comprising the <sup>1</sup>H NMR spectrum and ESI mass spectrum, is presented in Figure S1 in the Supporting Information. To characterize the  $\alpha$ Asp<sub>3</sub>-(OMe)<sub>4</sub> moiety, the product was evaluated by <sup>1</sup>H NMR spectroscopy and ESI-MS, as shown in Figure S1(d) and 1(e). The <sup>1</sup>H NMR spectra revealed triplet peaks at ~3.74–3.84 ppm that correspond to OCH<sub>3</sub>, a peak at ~3.29 ppm attributed to CH<sub>2</sub>, and a peak at 4.65 ppm attributed to CH. The ESI-mass spectrum revealed a molecular weight of 420.20 Da, indicating that the synthesis of the  $\alpha$ Asp<sub>3</sub>-(OMe)<sub>4</sub> moiety was successful. The following steps were used to synthesize  $\alpha$ Asp<sub>3</sub>-PEG-NH<sub>2</sub> polymers and  $\alpha$ Asp<sub>3</sub>-PEG-PLGA.  $\alpha$ Asp<sub>3</sub>-(OMe)<sub>4</sub> reacted with heterobifunctional NH<sub>2</sub>-PEG-COOH to form H<sub>2</sub>N-PEG- $\alpha$ Asp<sub>3</sub>-(OMe)<sub>4</sub> by amide bond formation. The bone-targeting functional polymer H<sub>2</sub>N-PEG- $\alpha$ Asp<sub>3</sub> was obtained after removing OMe from H<sub>2</sub>N-PEG- $\alpha$ Asp<sub>3</sub>-(OMe)<sub>4</sub>, and relevant chemical evidence from the FTIR spectra is also shown in Figure S2(d) in the Supporting Information. First, the carboxylic groups of the aspartic acid side chains were methylated; i.e., the O=C-OH groups were converted to O=C-CH<sub>3</sub>. The FTIR spectrum of  $\alpha$ Asp<sub>3</sub>-(OMe)<sub>4</sub> revealed a peak at ~1729 cm<sup>-1</sup>, which was attributed to O=C stretching. The FTIR spectrum of H<sub>2</sub>N-PEG-COOH indicated antisymmetric stretching of the ether group (1095 cm<sup>-1</sup>). However, H<sub>2</sub>N-

PEG-COOH reacted with  $\alpha$ Asp<sub>3</sub>-(OMe)<sub>4</sub>, and peaks at  $\sim 1729\text{ cm}^{-1}$  and  $\sim 1095\text{ cm}^{-1}$  were also observed in the FTIR spectrum, indicating the presence of ester and amide bonds, respectively. The H<sub>2</sub>N-PEG- $\alpha$ Asp<sub>3</sub>-(OMe)<sub>4</sub> copolymer indicated successful conjugation from H<sub>2</sub>N-PEG-COOH and  $\alpha$ Asp<sub>3</sub>. To complete the bone-targeting functional amphiphilic block copolymer  $\alpha$ Asp<sub>3</sub>-PEG-PLGA, NH<sub>2</sub>-PEG- $\alpha$ Asp<sub>3</sub>-(OMe)<sub>4</sub> lost its methoxy (OMe) moiety to form the bone-targeting functional segment NH<sub>2</sub>-PEG- $\alpha$ Asp<sub>3</sub>. Then, NH<sub>2</sub>-PEG- $\alpha$ Asp<sub>3</sub> directly conjugated with PLGA-COOH through an amide linkage to form the amphiphilic block copolymer  $\alpha$ Asp<sub>3</sub>-PEG-PLGA. The <sup>1</sup>H NMR spectra verified the formation of  $\alpha$ Asp<sub>3</sub>-PEG-PLGA, as shown in Figure S2(e) in the Supporting Information. These spectra showed a signal peak at 1.56 ppm attributed to PLA methyl protons (CH<sub>3</sub>), a peak at 4.66–4.81 ppm attributed to PGA methylene protons (CH<sub>2</sub>), and a peak at 3.64 ppm attributed to PEG ether linkages. However, the <sup>1</sup>H-NMR signals of  $\alpha$ Asp<sub>3</sub> were much less intense than those of PLGA and PEG and were not visible. The FTIR and <sup>1</sup>H-NMR spectra confirmed that H<sub>2</sub>N-PEG- $\alpha$ Asp<sub>3</sub> was conjugated to the PLGA chain to form the bone-targeting functional amphiphilic block copolymer  $\alpha$ Asp<sub>3</sub>-PEG-PLGA. The amphiphilic copolymer PLGA-PEG was synthesized by direct conjugation of PLGA-COOH with H<sub>2</sub>N-PEG-OMe by an amide linkage. To characterize the PLGA-PEG copolymer, the product was evaluated by <sup>1</sup>H-NMR spectroscopy, as shown in Figure S3 (b), and a signal peak at 1.56 ppm attributed to PLA methyl protons (PLA CH<sub>3</sub>), a peak at 4.66–4.81 ppm attributed to PGA methylene protons (CH<sub>2</sub>), and a peak at 3.64 ppm attributed to PEG ether linkages were observed. Therefore, the <sup>1</sup>H-NMR spectra confirmed that H<sub>2</sub>N-PEG-OMe was incorporated into the PLGA chain.

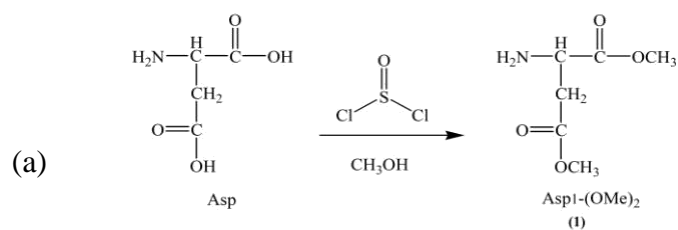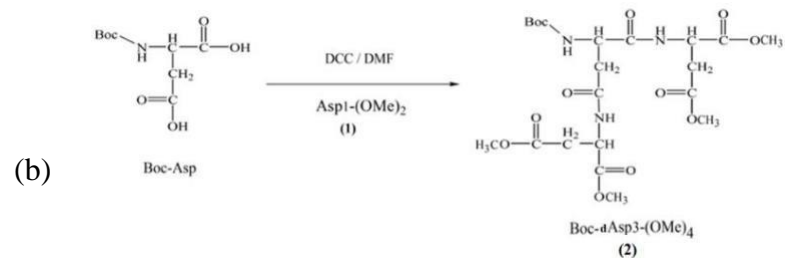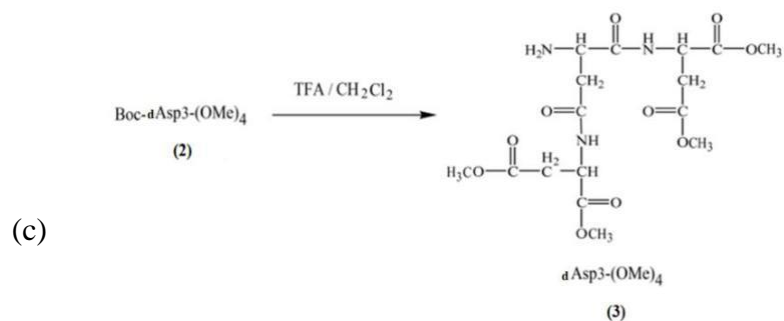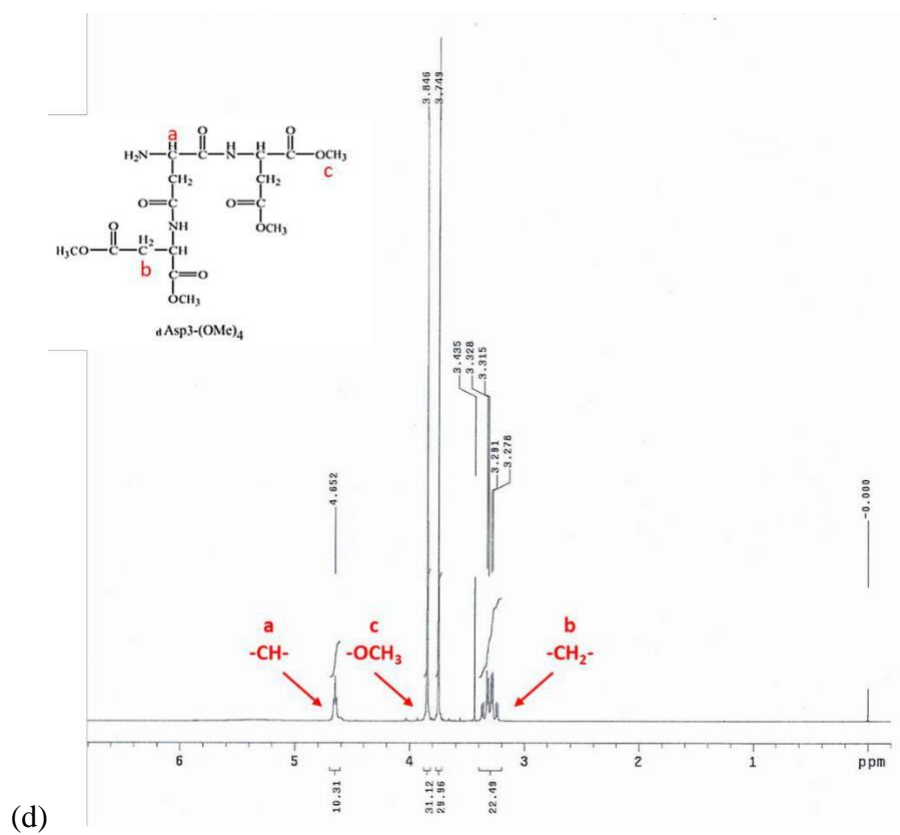



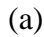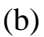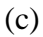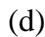

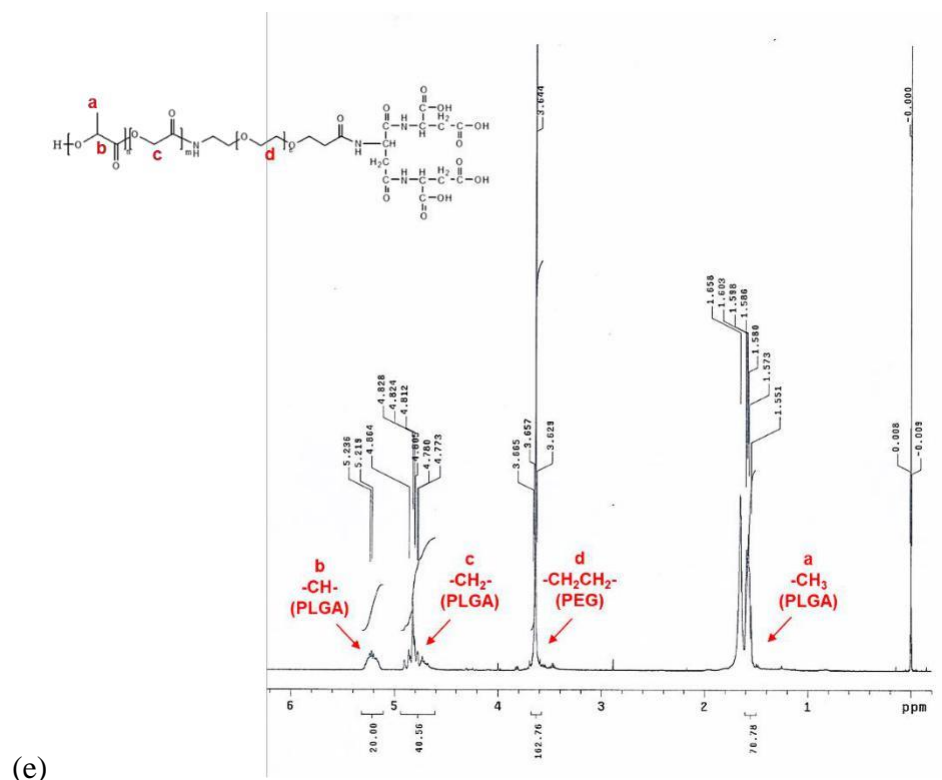

**Figure S2.** The synthesis mechanism and the steps used to make dAsp3-PEG-NH<sub>2</sub> copolymers (a, b) and the dAsp3-PEG-PLGA (c). However, the FTIR spectrum and the <sup>1</sup>H NMR spectra of the dAsp3-PEG-PLGA (APP) copolymer were showed in (d) and (e).

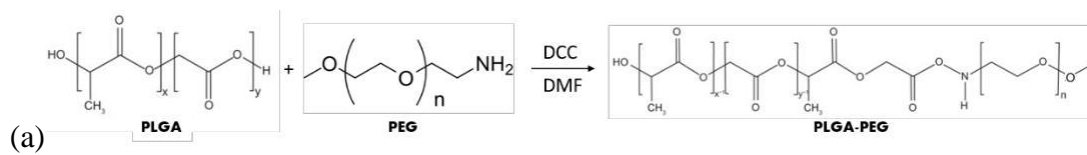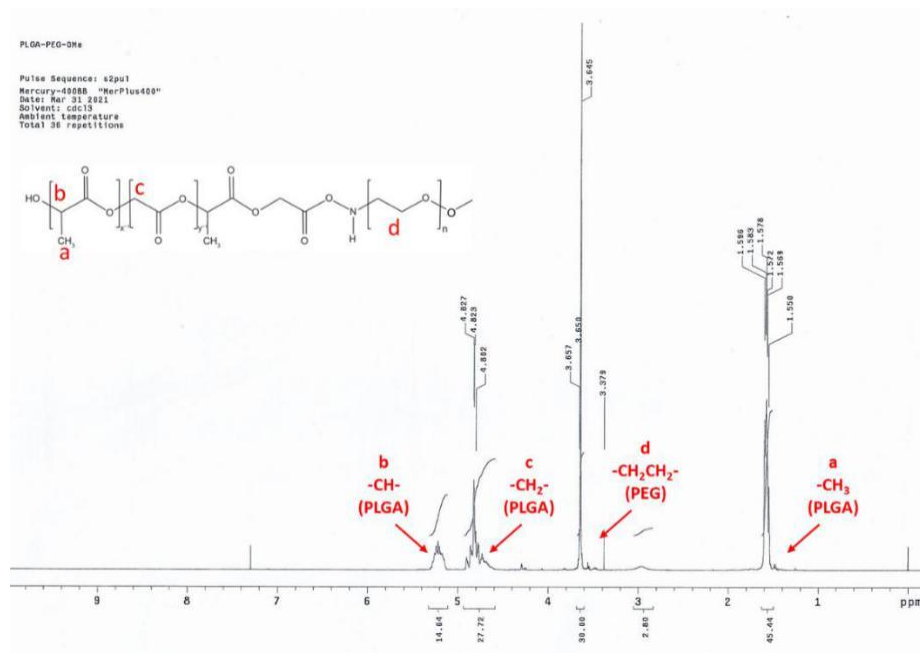

**Figure S3.** The synthesis scheme of the amphoteric block copolymer of PEG-PLGA (a) and  $^1\text{H}$  NMR spectrum of PEG-PLGA (b).

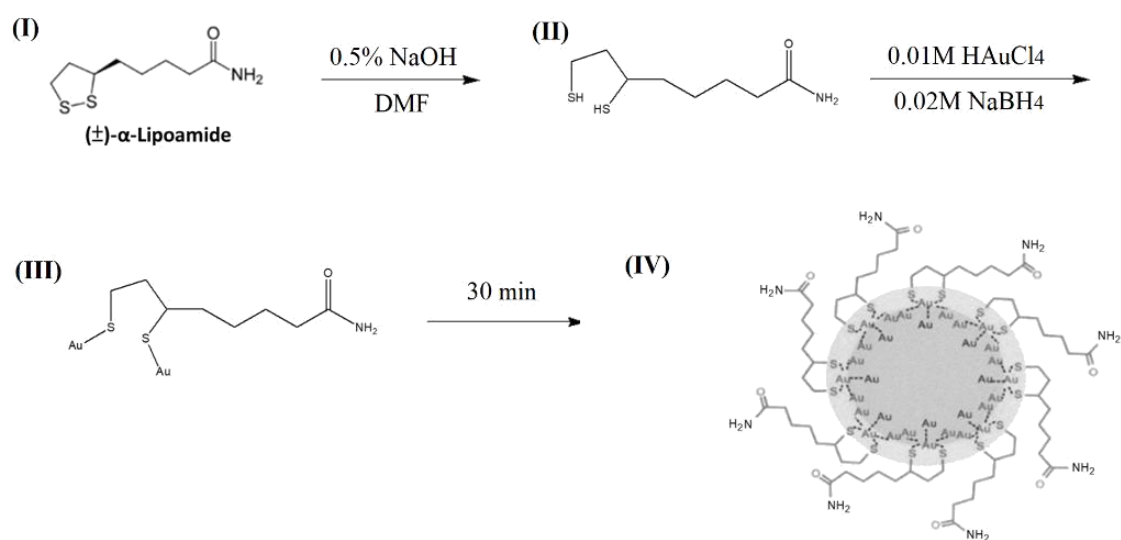

**Figure S4.** Schematic diagram of synthesis gold nanoclusters (GNCs) with 1° amide group using (±)-α-Lipoamide template.



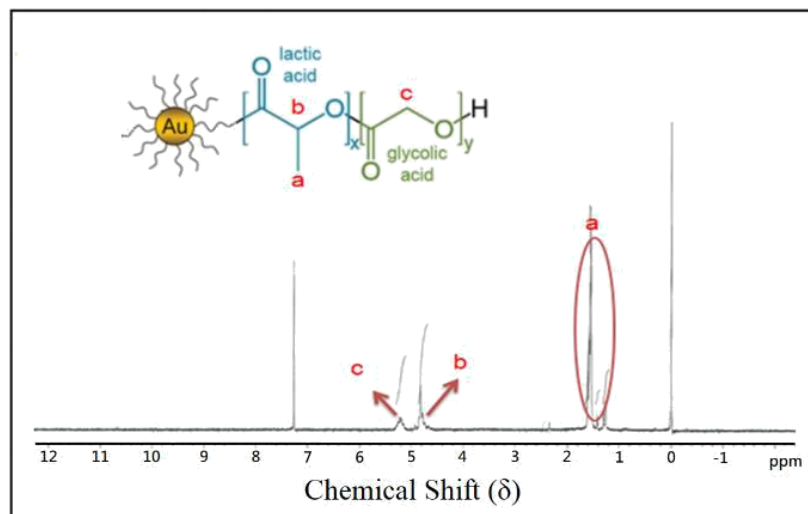

**Figure S5.** The  $^1\text{H}$  NMR spectrum of GNC coupling with PLGA (GNC-PLGA).

The  $^1\text{H}$ -NMR spectra verified the GNC-PLGA structure (Figure S5) showing a signal peak at 1.56 ppm representing PLA methyl protons (PLA  $\text{CH}_3$ ), The peaks at 5.2 ppm, and 4.8 ppm are related to the  $\text{CH-CH}_3$  from lactic acid and  $\text{CH-H}$  from glycolic acid, respectively. This confirms the synthesis of the PLGA copolymer [66]. There are no obvious GNC surface functional group peaks of lipoamide ligand since the amount of lipoamide functional group is too small. Whatever, the  $^1\text{H}$ -NMR spectra also combined fluorescence spectrum (Fig. 2(c) of the manuscript) can be confirmed that GNCs were incorporated into the PLGA chain.

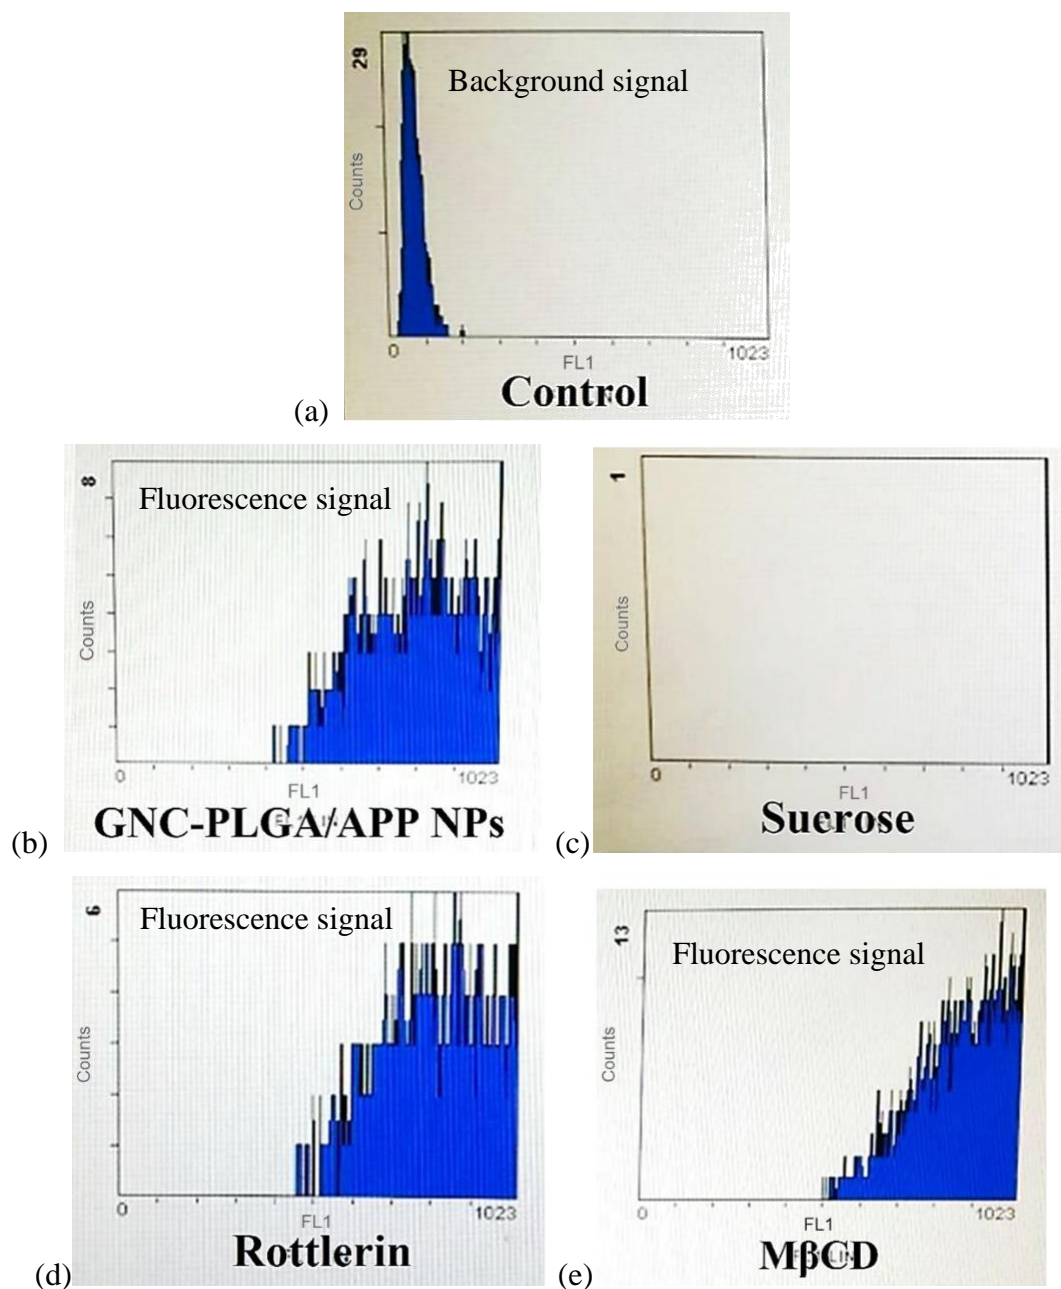

**Figure S6.** Side scattering intensity (SSC) histograms of D1 cells with incident light wavelengths. Typical flow cytometry results for untreated cells (a; Control) and cells exposed to fluorescently labeled GNC-PLGA/APP NPs (b~e). Flow cytometry-based quantitative analysis of the uptake of GNC-PLGA/APP NPs in D1 cells without inhibitors (b) and the presence of different endocytosis inhibitors, such as sucrose (c), Rottlerin (d), MβCD (e).

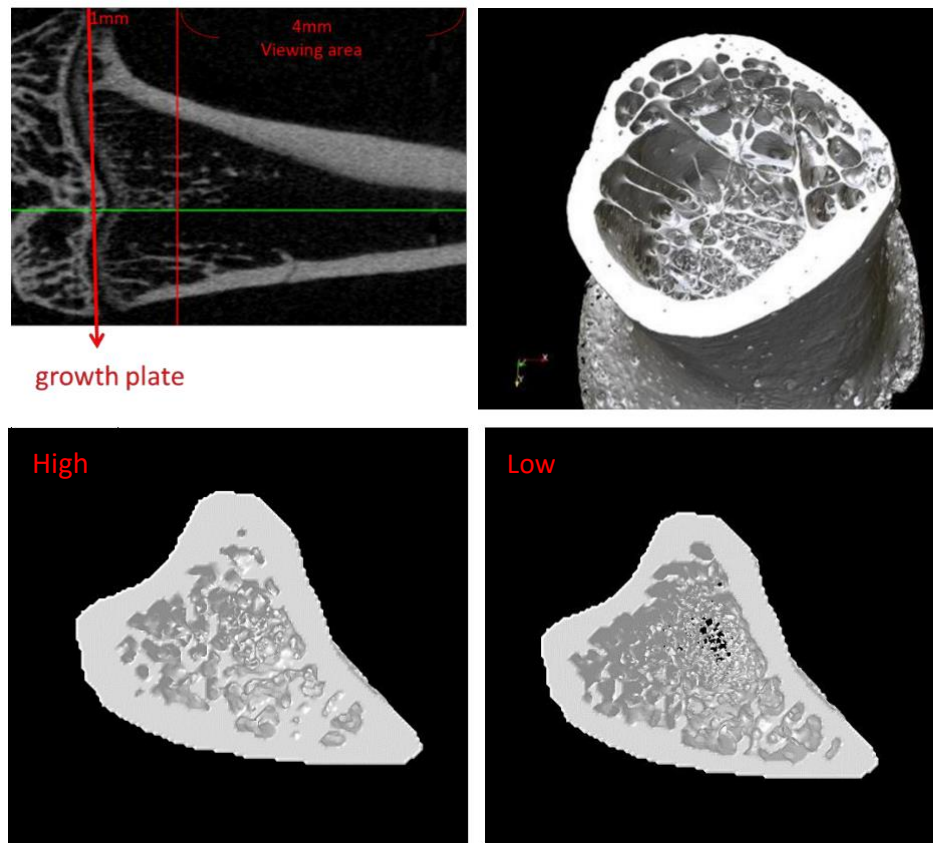

**Figure S7.** The distal portion of the tibia was scanned with a spatial resolution of 35  $\mu\text{m}$  to reconstruct the 3D bone skeleton and quantitative bone volume to total volume (BV/TV ratio) by grayscale and using a high-resolution micro-CT scanner (Skyscan 1076, Belgium).

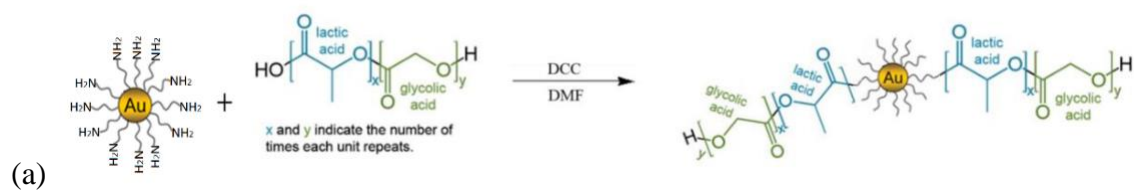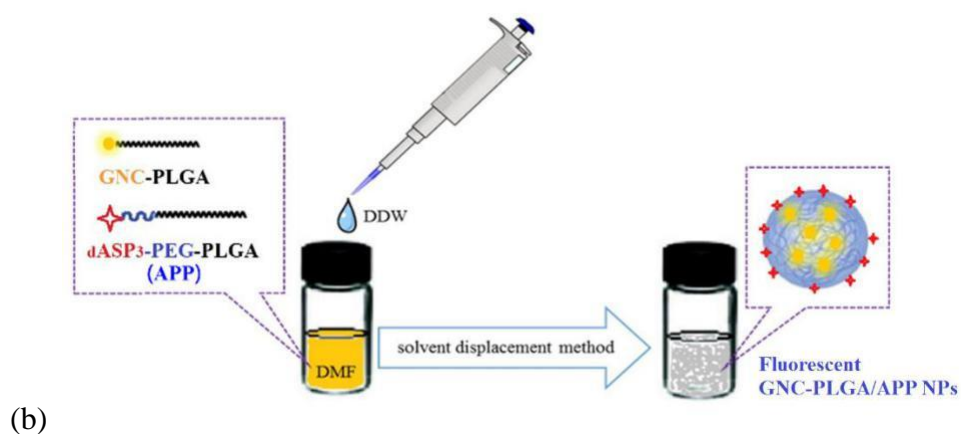

**Figure S8.** Schematic of the synthesis of gold nanocluster (GNC) coupled with PLGA (GNC-PLGA) (a) and the formation diagram of bone-targeted fluorescent nanoparticles composed of GNC-PLGA and dAsp3-PEG-PLGA (APP) block polymer, whose weight ratio is approximately 1/2 (b).
